# Supplementary material
Source: Springer Nature journal article supplement (https://www.springermedizin.de/resource/supplementary/12967_2006_167_MOESM7_ESM.pdf/9575994)

Log2 FC DDX58

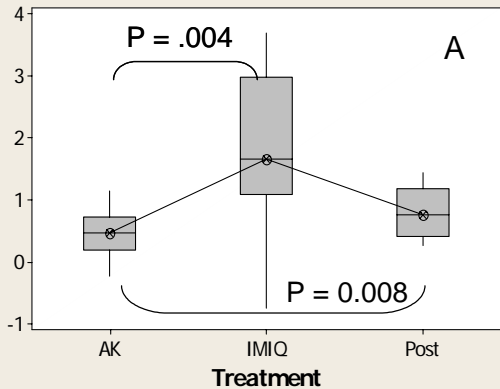

Log2 FC IFIH1

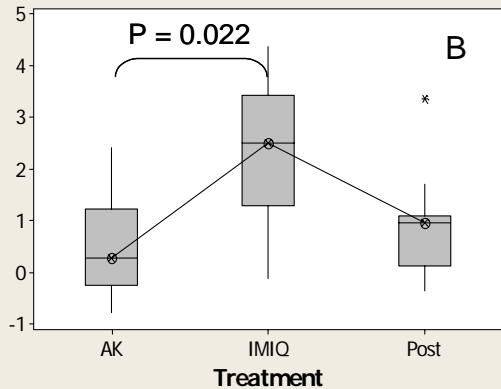

Supplement: MOESM7 [file 9575994]
